# Supplementary material for: Cell-loaded injectable gelatin/alginate/LAPONITE® nanocomposite hydrogel promotes bone healing in a critical-size rat calvarial defect model
Source: Royal Society of Chemistry journal article supplement (doi:10.1039/d0ra03040f), 2020-01-01
Supplement: d0ra03040f1.pdf [file d0ra03040f1.pdf]

Supplementary Information

**Cell-loaded injectable gelatin/alginate/Laponite nanocomposite hydrogel promotes bone healing in a critical-size rat calvarial defect model**

Bin Liu<sup>a</sup>, Junqin Li<sup>a</sup>, Xing Lei<sup>a,b</sup>, Sheng Miao<sup>a</sup>, Shuaishuai Zhang<sup>a</sup>, Pengzhen Cheng<sup>a</sup>,  
Yue Song<sup>a</sup>, Hao Wu<sup>a</sup>, Yi Gao<sup>a</sup>, Long Bi<sup>a\*</sup>, Guoxian Pei<sup>a\*</sup>

<sup>a</sup> Department of Orthopedics, Xijing Hospital, Fourth Military Medical University, Xi'an, 710032, P. R. China

<sup>b</sup> Department of Orthopedics, Linyi People's Hospital, Linyi, 276000, P. R. China

\* Corresponding Authors: Long Bi; Guoxian Pei

E-mail: bilong@fmmu.edu.cn; nfperry@163.com

**Figure S1**

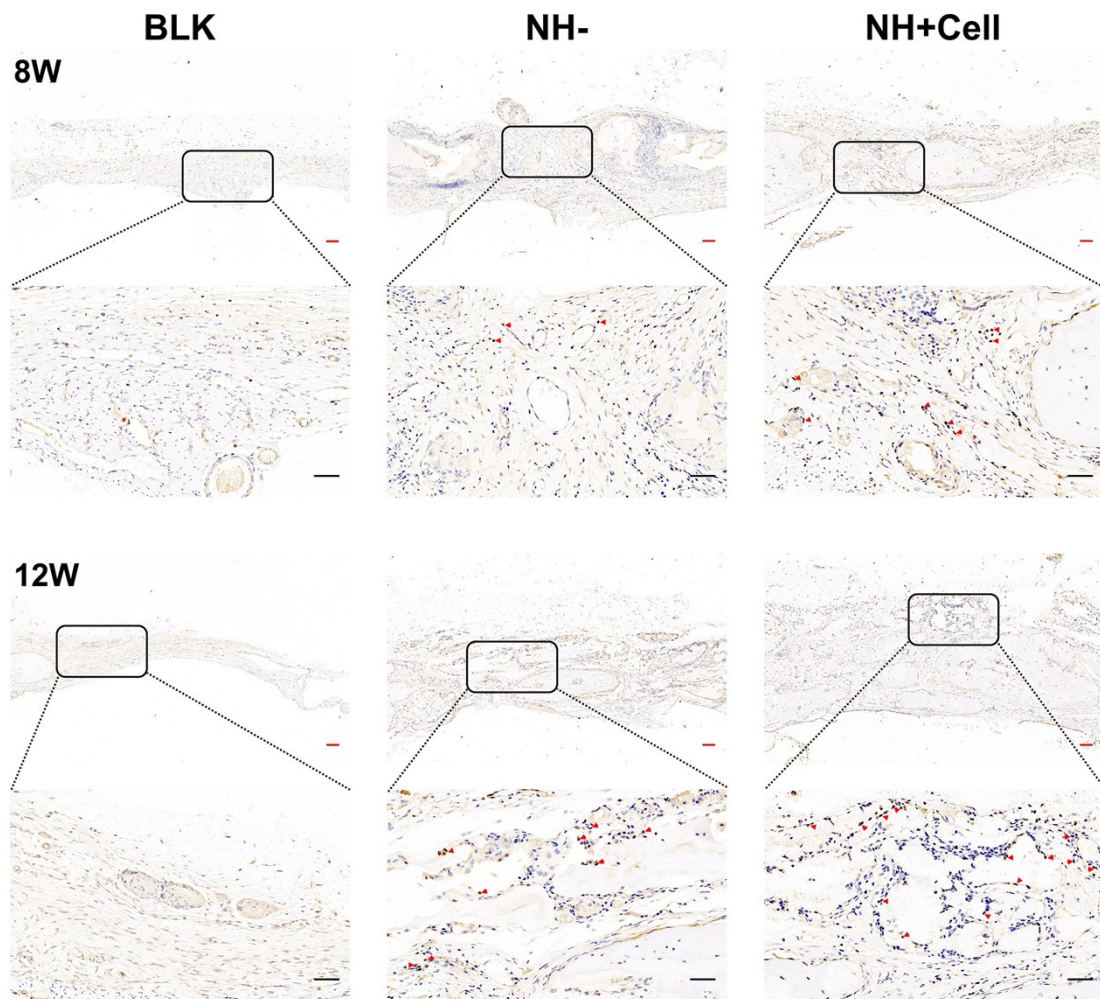

**Figure S1.** The Osterix immunohistochemical staining of the bone defects at 8-week and 12-week after injectability of the nanocomposite hydrogel with (NH+Cell) or without cells (NH-). The positive cells were marked by red arrows. Scale bar: Red: 100  $\mu\text{m}$ , Black: 50  $\mu\text{m}$ .
